# Supplementary material for: Disparity in Health Screening and Health Utilization according to Economic Status
Source: PubMed Central journal article supplement — Korean J Fam Med. 2017 Jul 20;38(4):220–5. doi: 10.4082/kjfm.2017.38.4.220 (PMC5541170; doi:10.4082/kjfm.2017.38.4.220), 2017-07-20
Supplement: kjfm-38-220-s001.pdf [file kjfm-38-220-s001.pdf]

**Supplemental table 1.** Characteristics of the cardiovascular health screening program attendees and non-attendees

| Characteristic                       | No.     | Non-attendee (n=201,622) | Attendee (n=104,584) | P-value* |
|--------------------------------------|---------|--------------------------|----------------------|----------|
| Age (y)                              |         |                          |                      | <0.001   |
| 40–49                                | 154,011 | 101,595 (50.39)          | 52,416 (50.12)       |          |
| 50–59                                | 77,885  | 48,869 (24.24)           | 29,016 (27.74)       |          |
| 60–69                                | 46,840  | 30,196 (14.98)           | 16,644 (15.91)       |          |
| ≥70                                  | 27,470  | 20,962 (10.40)           | 6,508 (6.22)         |          |
| Female gender                        | 154,704 | 107,222 (53.18)          | 47,482 (45.40)       | <0.001   |
| Disability                           | 14,031  | 9,615 (4.77)             | 4,416 (4.22)         | <0.001   |
| Charlson comorbidity index           |         | 0.41±0.87                | 0.45±0.83            |          |
| Body mass index (kg/m <sup>2</sup> ) | 104,536 |                          | 23.70±2.92           |          |
| <18.5                                |         |                          | 2,846 (2.72)         |          |
| 18.5–23.0                            |         |                          | 40,575 (38.81)       |          |
| 23.0–25.0                            |         |                          | 28,530 (27.29)       |          |
| 25.0–30.0                            |         |                          | 30,282 (28.97)       |          |
| >30.0                                |         |                          | 2,303 (2.20)         |          |
| Smoking                              | 97,291  |                          |                      |          |
| Non smoker                           |         |                          | 67,105 (68.97)       |          |
| Past smoker                          |         |                          | 4,613 (4.74)         |          |
| Current smoker                       |         |                          | 25,573 (26.29)       |          |
| Drinking                             | 103,135 |                          |                      |          |
| Non drinker                          |         |                          | 56,874 (55.15)       |          |
| Drinker                              |         |                          | 46,261 (44.85)       |          |
| Systolic BP (mm Hg)                  | 104,547 |                          | 124.86±17.28         |          |
| <140                                 |         |                          | 81,849 (78.29)       |          |
| ≥140                                 |         |                          | 22,698 (21.71)       |          |
| Diastolic BP (mm Hg)                 | 104,538 |                          | 78.36±11.36          |          |
| <90                                  |         |                          | 81,609 (78.07)       |          |
| ≥90                                  |         |                          | 22,929 (21.93)       |          |
| Fasting glucose (mg/dL)              | 104,468 |                          | 94.97±26.83          |          |
| <126                                 |         |                          | 99,459 (95.21)       |          |
| ≥126                                 |         |                          | 5,009 (4.79)         |          |
| Total cholesterol (mg/dL)            | 104,408 |                          | 197.65±37.18         |          |
| <240                                 |         |                          | 91,303 (87.45)       |          |
| ≥240                                 |         |                          | 13,105 (12.55)       |          |

Values are presented as number (%) or mean±standard deviation.

BP, blood pressure.

\*By chi-square test for categorical variable.
