# Supplementary material for: Disparity in Health Screening and Health Utilization according to Economic Status
Source: PubMed Central journal article supplement — Korean J Fam Med. 2017 Jul 20;38(4):220–5. doi: 10.4082/kjfm.2017.38.4.220 (PMC5541170; doi:10.4082/kjfm.2017.38.4.220), 2017-07-20
Supplement: kjfm-38-220-s002.pdf [file kjfm-38-220-s002.pdf]

**Supplemental table 2.** Characteristics of the National Health Insurance Corporation sample cohort database by economic status

| Characteristic                       | Economic status (n=306,206) |                |                |                |                      | P-value* |
|--------------------------------------|-----------------------------|----------------|----------------|----------------|----------------------|----------|
|                                      | Lowest 1 (n=43,429)         | 2 (n=45,700)   | 3 (n=54,353)   | 4 (n=67,838)   | Highest 5 (n=94,886) |          |
| Age (y)                              |                             |                |                |                |                      |          |
| 40–49                                | 18,637 (42.91)              | 22,263 (48.72) | 28,098 (51.7)  | 34,791 (51.29) | 50,222 (52.93)       | <0.001   |
| 50–59                                | 11,548 (26.59)              | 12,970 (28.38) | 14,739 (27.12) | 16,509 (24.34) | 22,119 (23.31)       | <0.001   |
| 60–69                                | 8,070 (18.58)               | 6,843 (14.97)  | 7,963 (14.65)  | 11,144 (16.43) | 12,820 (13.51)       | <0.001   |
| ≥70                                  | 5,174 (11.91)               | 3,624 (7.93)   | 3,553 (6.54)   | 5,394 (7.95)   | 9,725 (10.25)        | <0.001   |
| Female gender                        | 24,186 (55.69)              | 23,596 (51.63) | 26,584 (48.91) | 33,076 (48.76) | 47,262 (49.81)       | <0.001   |
| Disability                           | 2,912 (6.71)                | 2,604 (5.7)    | 2,662 (4.9)    | 2,838 (4.18)   | 3,015 (3.18)         | <0.001   |
| Charlson comorbidity index           | 0.41±0.84                   | 0.40±0.83      | 0.41±0.85      | 0.43±0.87      | 0.45±0.89            |          |
| Body mass index (kg/m <sup>2</sup> ) | 21.30±4.23                  | 21.36±4.10     | 21.50±4.04     | 21.65±3.90     | 21.60±3.81           | <0.001   |
| <18.5                                | 541 (3.56)                  | 435 (3.09)     | 464 (2.87)     | 549 (2.46)     | 857 (2.33)           |          |
| 18.5–23.0                            | 6,147 (40.42)               | 5,749 (40.88)  | 6,318 (39.09)  | 8,396 (37.66)  | 13,965 (37.94)       |          |
| 23.0–25.0                            | 3,955 (26.01)               | 3,637 (25.86)  | 4,278 (26.47)  | 6,098 (27.35)  | 10,562 (28.69)       |          |
| 25.0–30.0                            | 4,178 (27.47)               | 3,895 (27.69)  | 4,711 (29.15)  | 6,744 (30.25)  | 10,754 (29.22)       |          |
| >30.0                                | 386 (2.54)                  | 348 (2.47)     | 391 (2.42)     | 507 (2.27)     | 671 (1.82)           |          |
| Smoking                              |                             |                |                |                |                      |          |
| Non smoker                           | 10,684 (74.26)              | 9,535 (72.07)  | 10,149 (67.12) | 13,647 (65.95) | 23,090 (68.19)       | <0.001   |
| Past smoker                          | 372 (2.59)                  | 385 (2.91)     | 572 (3.78)     | 985 (4.76)     | 2,299 (6.79)         |          |
| Current smoker                       | 3,332 (23.16)               | 3,310 (25.02)  | 4,400 (29.10)  | 6,060 (29.29)  | 8,471 (25.02)        |          |
| Drinking                             |                             |                |                |                |                      |          |
| Non drinker                          | 9,319 (62.04)               | 8,195 (58.99)  | 8,814 (55.20)  | 11,629 (52.89) | 18,917 (52.16)       | <0.001   |
| Drinker                              | 5,701 (37.96)               | 5,697 (41.01)  | 7,152 (44.80)  | 10,359 (47.11) | 17,352 (47.84)       |          |
| Systolic BP (mm Hg)                  | 126.81±18.29                | 126.08±17.80   | 125.40±17.46   | 125.16±17.15   | 123.16±16.49         | <0.001   |
| <140                                 | 11,222 (73.79)              | 10,591 (75.30) | 12,417 (76.83) | 17,419 (78.13) | 30,200 (82.03)       |          |
| ≥140                                 | 3,987 (26.21)               | 3,474 (24.70)  | 3,744 (23.17)  | 4,877 (21.87)  | 6,616 (17.97)        |          |
| Diastolic BP (mm Hg)                 | 79.14±11.72                 | 78.72±11.47    | 78.60±11.44    | 78.61±11.36    | 77.64±11.09          | <0.001   |
| <90                                  | 11,451 (75.31)              | 10,830 (77.00) | 12,436 (76.96) | 17,275 (77.49) | 29,617 (80.45)       |          |
| ≥90                                  | 3,754 (24.69)               | 3,235 (23.00)  | 3,724 (23.04)  | 5,017 (22.51)  | 7,199 (19.55)        |          |
| Fasting glucose (mg/dL)              | 96.24±31.87                 | 95.52±29.97    | 95.50±28.05    | 95.08±25.34    | 93.94±23.36          | <0.001   |
| <126                                 | 14,289 (94.06)              | 13,291 (94.59) | 15,282 (94.64) | 21,189 (95.10) | 35,408 (96.23)       |          |
| ≥126                                 | 902 (5.94)                  | 760 (5.41)     | 866 (5.36)     | 1,092 (4.90)   | 1,389 (3.77)         |          |
| Total cholesterol (mg/dL)            | 198.31±38.37                | 196.44±37.78   | 197.61±37.68   | 197.53±37.24   | 197.93±36.16         | <0.003   |
| <240                                 | 13,142 (86.57)              | 12,321 (87.71) | 14,092 (87.31) | 19,459 (87.40) | 32,289 (87.80)       |          |
| ≥240                                 | 2,039 (13.43)               | 1,726 (12.29)  | 2,049 (12.69)  | 2,806 (12.60)  | 4,485 (12.20)        |          |

Values are presented as number (%) or mean±standard deviation.

BP, blood pressure.

\*By chi-square test for categorical variable.
