# Supplementary material for: Disparity in Health Screening and Health Utilization according to Economic Status
Source: PubMed Central journal article supplement — Korean J Fam Med. 2017 Jul 20;38(4):220–5. doi: 10.4082/kjfm.2017.38.4.220 (PMC5541170; doi:10.4082/kjfm.2017.38.4.220), 2017-07-20
Supplement: kjfm-38-220-s003.pdf [file kjfm-38-220-s003.pdf]

**Supplemental table 3.** Characteristics of the health screening program attenders by economic status

| Characteristic                       | No.     | Economic status |                |                |                |                | P-value* |
|--------------------------------------|---------|-----------------|----------------|----------------|----------------|----------------|----------|
|                                      |         | 1 (Lowest)      | 2              | 3              | 4              | 5 (Highest)    |          |
| Age (y)                              | 104,584 |                 |                |                |                |                | <0.001   |
| 40–49                                |         | 5,984 (39.33)   | 6,094 (43.31)  | 7,898 (48.85)  | 11,634 (52.15) | 20,806 (56.50) |          |
| 50–59                                |         | 4,359 (28.65)   | 4,454 (31.66)  | 4,887 (30.23)  | 5,856 (26.25)  | 9,460 (25.69)  |          |
| 60–69                                |         | 3,369 (22.15)   | 2,584 (18.37)  | 2,616 (16.18)  | 3,676 (16.48)  | 4,399 (11.95)  |          |
| ≥70                                  |         | 1,501 (9.87)    | 938 (6.67)     | 766 (4.74)     | 1,142 (5.12)   | 2,161 (5.87)   |          |
| Female gender                        | 47,482  | 8,854 (58.20)   | 7,520 (53.45)  | 7,270 (44.97)  | 9,078 (40.69)  | 14,760 (40.08) | <0.001   |
| Disability                           | 4,416   | 880 (5.78)      | 812 (5.77)     | 849 (5.25)     | 886 (3.97)     | 989 (2.69)     | <0.001   |
| Charlson comorbidity index           |         | 0.47±0.84       | 0.47±0.86      | 0.46±0.84      | 0.45±0.84      | 0.43±0.82      |          |
| Body mass index (kg/m <sup>2</sup> ) | 104,536 | 23.57±3.04      | 23.60±0.86     | 23.72±2.99     | 23.80±2.88     | 23.73±2.80     | <0.001   |
| <18.5                                |         | 541 (3.56)      | 435 (3.09)     | 464 (2.87)     | 549 (2.46)     | 857 (2.33)     |          |
| 18.5–23.0                            |         | 6,147 (40.42)   | 5,749 (40.88)  | 6,318 (39.09)  | 8,396 (37.66)  | 13,965 (37.94) |          |
| 23.0–25.0                            |         | 3,955 (26.01)   | 3,637 (25.86)  | 4,278 (26.47)  | 6,098 (27.35)  | 10,562 (28.69) |          |
| 25.0–30.0                            |         | 4,178 (27.47)   | 3,895 (27.69)  | 4,711 (29.15)  | 6,744 (30.25)  | 10,754 (29.22) |          |
| >30.0                                |         | 386 (2.54)      | 348 (2.47)     | 391 (2.42)     | 507 (2.27)     | 671 (1.82)     |          |
| Smoking                              | 97,291  |                 |                |                |                |                | <0.001   |
| Non smoker                           |         | 10,684 (74.26)  | 9,535 (72.07)  | 10,149 (67.12) | 13,647 (65.95) | 23,090 (68.19) |          |
| Past smoker                          |         | 372 (2.59)      | 385 (2.91)     | 572 (3.78)     | 985 (4.76)     | 2,299 (6.79)   |          |
| Current smoker                       |         | 3,332 (23.16)   | 3,310 (25.02)  | 4,400 (29.10)  | 6,060 (29.29)  | 8,471 (25.02)  |          |
| Drinking                             | 103,135 |                 |                |                |                |                | <0.001   |
| Non drinker                          |         | 9,319 (62.04)   | 8,195 (58.99)  | 8,814 (55.20)  | 11,629 (52.89) | 18,917 (52.16) |          |
| Drinker                              |         | 5,701 (37.96)   | 5,697 (41.01)  | 7,152 (44.80)  | 10,359 (47.11) | 17,352 (47.84) |          |
| Systolic BP (mm Hg)                  | 104,547 | 126.81±18.29    | 126.08±17.80   | 125.40±17.46   | 125.16±17.15   | 123.16±16.49   | <0.001   |
| <140                                 |         | 11,222 (73.79)  | 10,591 (75.30) | 12,417 (76.83) | 17,419 (78.13) | 30,200 (82.03) |          |
| ≥140                                 |         | 3,987 (26.21)   | 3,474 (24.70)  | 3,744 (23.17)  | 4,877 (21.87)  | 6,616 (17.97)  |          |
| Diastolic BP (mm Hg)                 | 104,538 | 79.14±11.72     | 78.72±11.47    | 78.60±11.44    | 78.61±11.36    | 77.64±11.09    | <0.001   |
| <90                                  |         | 11,451 (75.31)  | 10,830 (77.00) | 12,436 (76.96) | 17,275 (77.49) | 29,617 (80.45) |          |
| ≥90                                  |         | 3,754 (24.69)   | 3,235 (23.00)  | 3,724 (23.04)  | 5,017 (22.51)  | 7,199 (19.55)  |          |
| Fasting glucose (mg/dL)              | 104,468 | 96.24±31.87     | 95.52±29.97    | 95.50±28.05    | 95.08±25.34    | 93.94±23.36    | <0.001   |
| <126                                 |         | 14,289 (94.06)  | 13,291 (94.59) | 15,282 (94.64) | 21,189 (95.10) | 35,408 (96.23) |          |
| ≥126                                 |         | 902 (5.94)      | 760 (5.41)     | 866 (5.36)     | 1,092 (4.90)   | 1,389 (3.77)   |          |
| Total cholesterol (mg/dL)            | 104,408 | 198.31±38.37    | 196.44±37.78   | 197.61±37.68   | 197.53±37.24   | 197.93±36.16   | <0.003   |
| <240                                 |         | 13,142 (86.57)  | 12,321 (87.71) | 14,092 (87.31) | 19,459 (87.40) | 32,289 (87.80) |          |
| ≥240                                 |         | 2,039 (13.43)   | 1,726 (12.29)  | 2,049 (12.69)  | 2,806 (12.60)  | 4,485 (12.20)  |          |

Values are presented as number (%) or mean±standard deviation.

BP, blood pressure.

\*By chi-square test for categorical variable.
