# Supplementary material for: Disparity in Health Screening and Health Utilization according to Economic Status
Source: PubMed Central journal article supplement — Korean J Fam Med. 2017 Jul 20;38(4):220–5. doi: 10.4082/kjfm.2017.38.4.220 (PMC5541170; doi:10.4082/kjfm.2017.38.4.220), 2017-07-20
Supplement: kjfm-38-220-s004.pdf [file kjfm-38-220-s004.pdf]

**Supplemental table 4.** Attendance rate of nationwide health screening program according to male by economic status in 2003–2004

| Variable        | Attendance in 2003 or 2004 screening |                      | OR (95% CI)*     | Adjusted OR† (95% CI)* |
|-----------------|--------------------------------------|----------------------|------------------|------------------------|
|                 | Non-attendees (n=94,400)             | Attendees (n=57,102) |                  |                        |
| Economic status |                                      |                      |                  |                        |
| 1 (Lowest)      | 12,884 (45.66)                       | 6,359 (41.80)        | 1.05 (1.01–1.09) | 1.07 (1.03–1.12)       |
| 2               | 15,554 (49.17)                       | 6,550 (46.55)        | 0.89 (0.86–0.93) | 0.90 (0.87–0.94)       |
| 3               | 18,872 (49.42)                       | 8,897 (55.03)        | 1                | 1                      |
| 4               | 21,532 (47.29)                       | 13,230 (59.31)       | 1.30 (1.26–1.35) | 1.30 (1.26–1.35)       |
| 5 (Highest)     | 25,558 (44.02)                       | 22,066 (59.92)       | 1.83 (1.78–1.89) | 1.83 (1.77–1.88)       |

Values are presented as number (%).

OR, odds ratio; CI, confidence interval.

\*By logistic regression for categorical variable. †Adjusted for age, Charlson comorbidity index, and disability.
