# Supplementary material for: Disparity in Health Screening and Health Utilization according to Economic Status
Source: PubMed Central journal article supplement — Korean J Fam Med. 2017 Jul 20;38(4):220–5. doi: 10.4082/kjfm.2017.38.4.220 (PMC5541170; doi:10.4082/kjfm.2017.38.4.220), 2017-07-20
Supplement: kjfm-38-220-s005.pdf [file kjfm-38-220-s005.pdf]

**Supplemental table 5.** Attendance rate of nationwide health screening program according to female by economic status in 2003–2004

| Variable        | Attendance in 2003 or 2004 screening |                      | OR (95% CI)*     | Adjusted OR† (95% CI)* |
|-----------------|--------------------------------------|----------------------|------------------|------------------------|
|                 | Non-attendees (n=107,222)            | Attendees (n=47,482) |                  |                        |
| Economic status |                                      |                      |                  |                        |
| 1 (Lowest)      | 15,332 (54.34)                       | 8,854 (58.20)        | 1.53 (1.48–1.59) | 1.56 (1.50–1.62)       |
| 2               | 16,076 (50.83)                       | 7,520 (53.45)        | 1.24 (1.20–1.29) | 1.25 (1.20–1.30)       |
| 3               | 19,314 (50.58)                       | 7,270 (44.97)        | 1                | 1                      |
| 4               | 23,998 (52.71)                       | 9,078 (40.69)        | 1.00 (0.97–1.04) | 1.01 (0.97–1.05)       |
| 5 (Highest)     | 32,502 (55.98)                       | 14,760 (40.08)       | 1.20 (1.17–1.25) | 1.21 (1.17–1.25)       |

Values are presented as number (%).

OR, odds ratio; CI, confidence interval.

\*By logistic regression for categorical variable. †Adjusted for age, Charlson comorbidity index, and disability.
