# Supplementary material for: Disparity in Health Screening and Health Utilization according to Economic Status
Source: PubMed Central journal article supplement — Korean J Fam Med. 2017 Jul 20;38(4):220–5. doi: 10.4082/kjfm.2017.38.4.220 (PMC5541170; doi:10.4082/kjfm.2017.38.4.220), 2017-07-20
Supplement: kjfm-38-220-s006.pdf [file kjfm-38-220-s006.pdf]

**Supplemental table 6.** The outpatient clinic visit rate of males after attending the health screening program and diagnosed with diabetes mellitus, hypertension and dyslipidemia according to economic status

| Variable                 | No.    | Economic status |               |               |               |               | P-value* |
|--------------------------|--------|-----------------|---------------|---------------|---------------|---------------|----------|
|                          |        | 1 (Lowest)      | 2             | 3             | 4             | 5 (Highest)   |          |
| <b>Diabetes mellitus</b> |        |                 |               |               |               |               |          |
| Diagnosed                | 3,523  | 564 (8.88)      | 516 (7.89)    | 635 (7.14)    | 798 (6.04)    | 1,010 (4.58)  | <0.001   |
| Outpatient visit         | 1,355  | 207 (36.70)     | 194 (37.60)   | 226 (35.59)   | 304 (38.10)   | 424 (41.98)   | <0.077   |
| <b>Hypertension</b>      |        |                 |               |               |               |               |          |
| Diagnosed                | 19,016 | 2,556 (40.19)   | 2,467 (37.66) | 3,128 (35.16) | 4,395 (33.22) | 6,470 (29.32) | <0.001   |
| Outpatient visit         | 5,475  | 816 (31.92)     | 751 (30.44)   | 805 (25.74)   | 1,216 (27.67) | 1,887 (29.17) | <0.001   |
| <b>Dyslipidemia</b>      |        |                 |               |               |               |               |          |
| Diagnosed                | 6,707  | 836 (13.17)     | 752 (11.50)   | 1,016 (11.43) | 1,537 (11.64) | 2,566 (11.64) | <0.007   |
| Outpatient visit         | 1,227  | 131 (15.67)     | 119 (15.82)   | 161 (15.85)   | 291 (18.93)   | 525 (20.46)   | <0.001   |

Values are presented as number (%).

\*By chi-square test for categorical variable.
