# Supplementary material for: Disparity in Health Screening and Health Utilization according to Economic Status
Source: PubMed Central journal article supplement — Korean J Fam Med. 2017 Jul 20;38(4):220–5. doi: 10.4082/kjfm.2017.38.4.220 (PMC5541170; doi:10.4082/kjfm.2017.38.4.220), 2017-07-20
Supplement: kjfm-38-220-s007.pdf [file kjfm-38-220-s007.pdf]

**Supplemental table 7.** The outpatient clinic visit rate of females after attending the health screening program and diagnosed with diabetes mellitus, hypertension and dyslipidemia according to economic status

| Variable                 | No.    | Economic status |               |               |               |               | P-value* |
|--------------------------|--------|-----------------|---------------|---------------|---------------|---------------|----------|
|                          |        | 1 (Lowest)      | 2             | 3             | 4             | 5 (Highest)   |          |
| <b>Diabetes mellitus</b> |        |                 |               |               |               |               |          |
| Diagnosed                | 1,486  | 338 (3.82)      | 244 (3.25)    | 231 (3.18)    | 294 (3.24)    | 379 (2.57)    | <0.001   |
| Outpatient visit         | 642    | 133 (39.35)     | 105 (43.03)   | 97 (41.99)    | 124 (42.18)   | 183 (48.28)   | <0.178   |
| <b>Hypertension</b>      |        |                 |               |               |               |               |          |
| Diagnosed                | 10,983 | 2,427 (27.41)   | 1,874 (24.92) | 1,748 (24.04) | 2,114 (23.29) | 2,820 (19.11) | <0.001   |
| Outpatient visit         | 4,212  | 900 (37.08)     | 736 (39.27)   | 662 (37.87)   | 799 (37.80)   | 1,115 (39.54) | <0.348   |
| <b>Dyslipidemia</b>      |        |                 |               |               |               |               |          |
| Diagnosed                | 6,398  | 1,203 (13.62)   | 974 (12.97)   | 1,033 (14.24) | 1,269 (14.01) | 1,919 (13.02) | <0.037   |
| Outpatient visit         | 1,547  | 253 (21.03)     | 208 (21.36)   | 256 (24.78)   | 302 (23.80)   | 528 (27.51)   | <0.001   |

Values are presented as number (%).

\*By chi-square test for categorical variable.
